# Supplementary material
Source: PubMed Central journal article supplement (PMC3837971)
Supplement: IAI.01008-13_zii999090418so1.pdf [file IAI.01008-13_zii999090418so1.pdf]

1 **Supporting information**

2

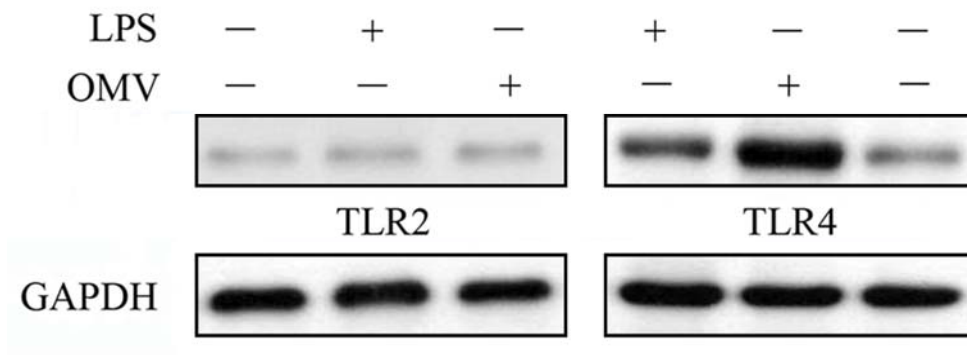

3

4 **Figure S1.** *P. aeruginosa* OMVs increased the intracellular expression of TLR4 but  
5 not TLR2. A549 cells were treated by purified OMVs at concentration 0.25 mg/ml or  
6 LPS at concentration 100 ng/ml and harvested after 24 h. Productions of TLR4 and  
7 TLR2 were determined by western blotting.

8

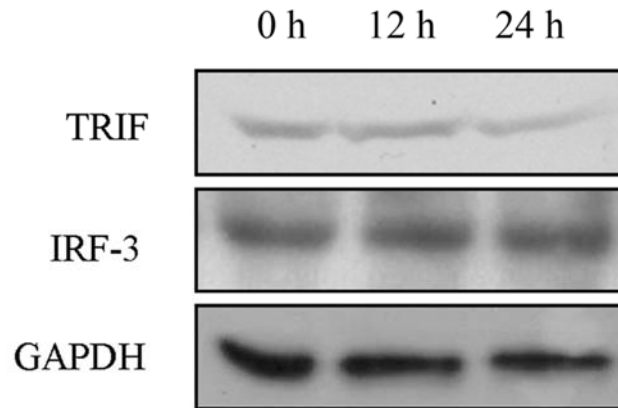

9

10 **Figure S2.** *P. aeruginosa* OMVs had no significant effect on the expression of TRIF  
11 and IRF-3. A549 cells were treated by purified OMVs at concentration 0.25 mg/ml  
12 and harvested after 24 h. Productions of TRIF and IRF-3 were determined by western  
13 blotting.

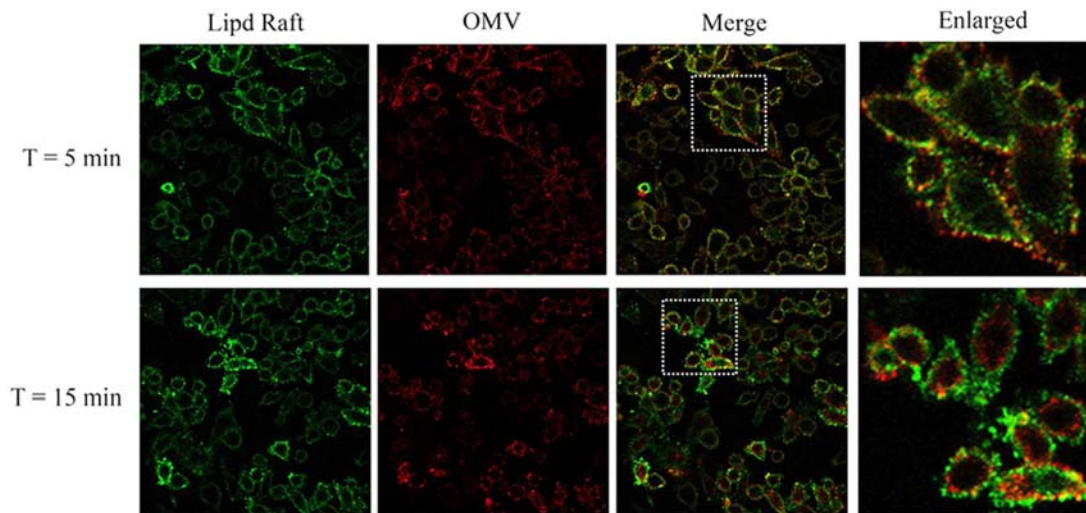

14

15 **Figure S3.** Phagocytosis of murine alveolar macrophages toward *P. aeruginosa*  
 16 OMVs. MH-S alveolar macrophages were exposed to native  
 17 X-Rhodamine-5-(and-6)-Isothiocyanate (5(6)-XRITC) (Molecular Probes®) labeled  
 18 vesicles for 5 min and 15 min. The unbound vesicles was washed off at the indicated  
 19 time points, and the cells were surface stained with lipid raft marker Alexa Fluor 488  
 20 (Green, Molecular Probes®) and visualized by confocal microscopy.
